# Supplementary material
Source: publisher figshare collection journal article supplement (https://springernature.figshare.com/ndownloader/files/21105795)
Supplement: Supplementary file 2 [file 21105795]

The image displays two rows of gel electrophoresis results. The left row contains six lanes, each showing a single prominent band at approximately 1200 bp. The right row contains five lanes, each showing a single prominent band at approximately 800 bp. A molecular weight marker is visible on the far left, with bands at 2000 bp and 1000 bp labeled.
