# Supplementary material
Source: publisher figshare collection journal article supplement (https://springernature.figshare.com/ndownloader/files/21105795)

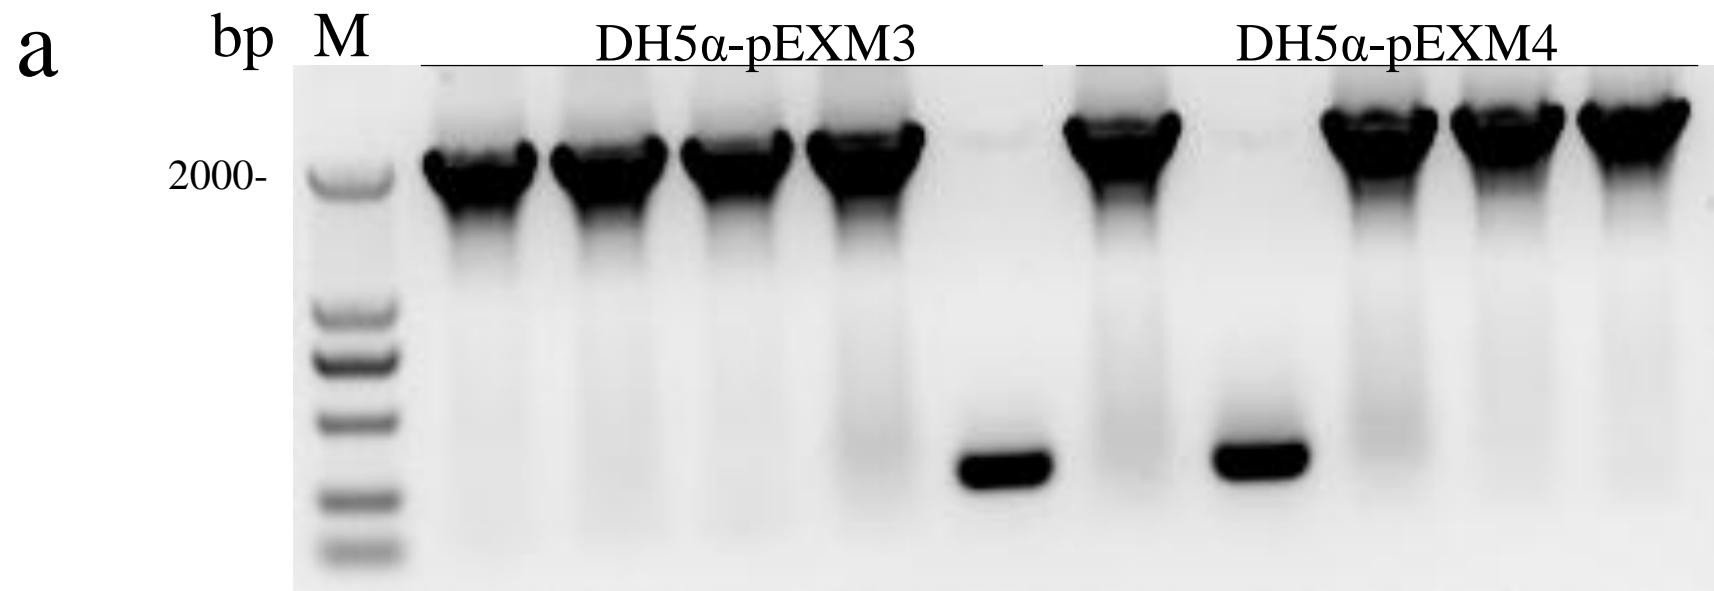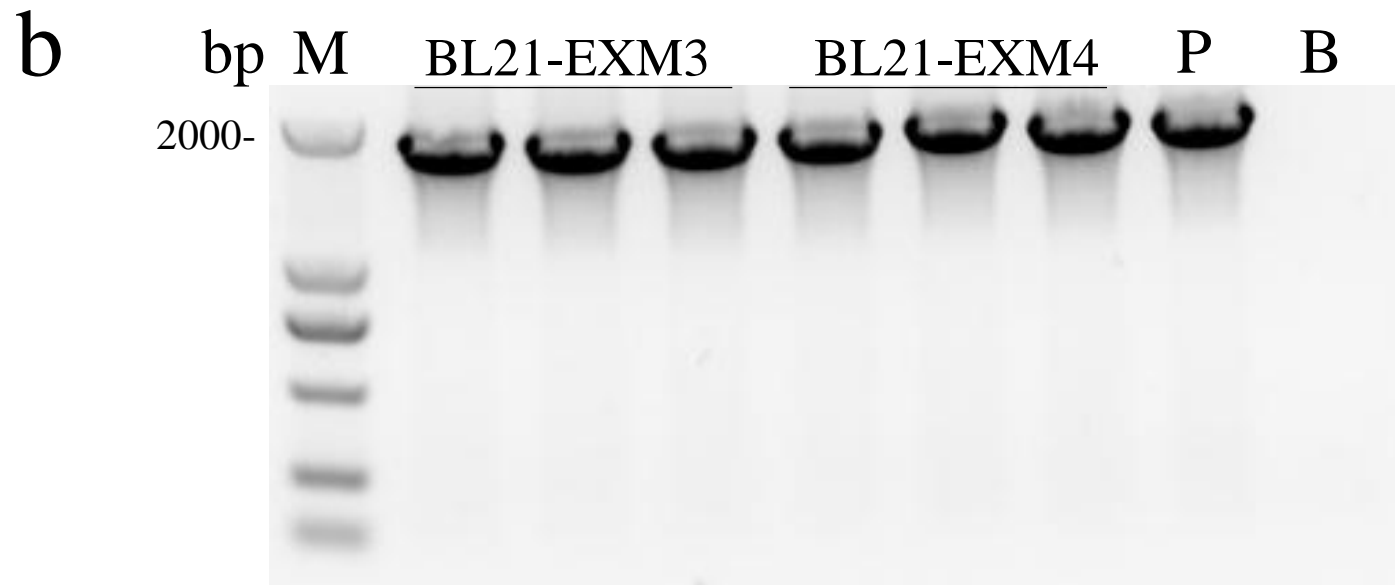

Supplement: Supplementary file 1 [file 21105795]

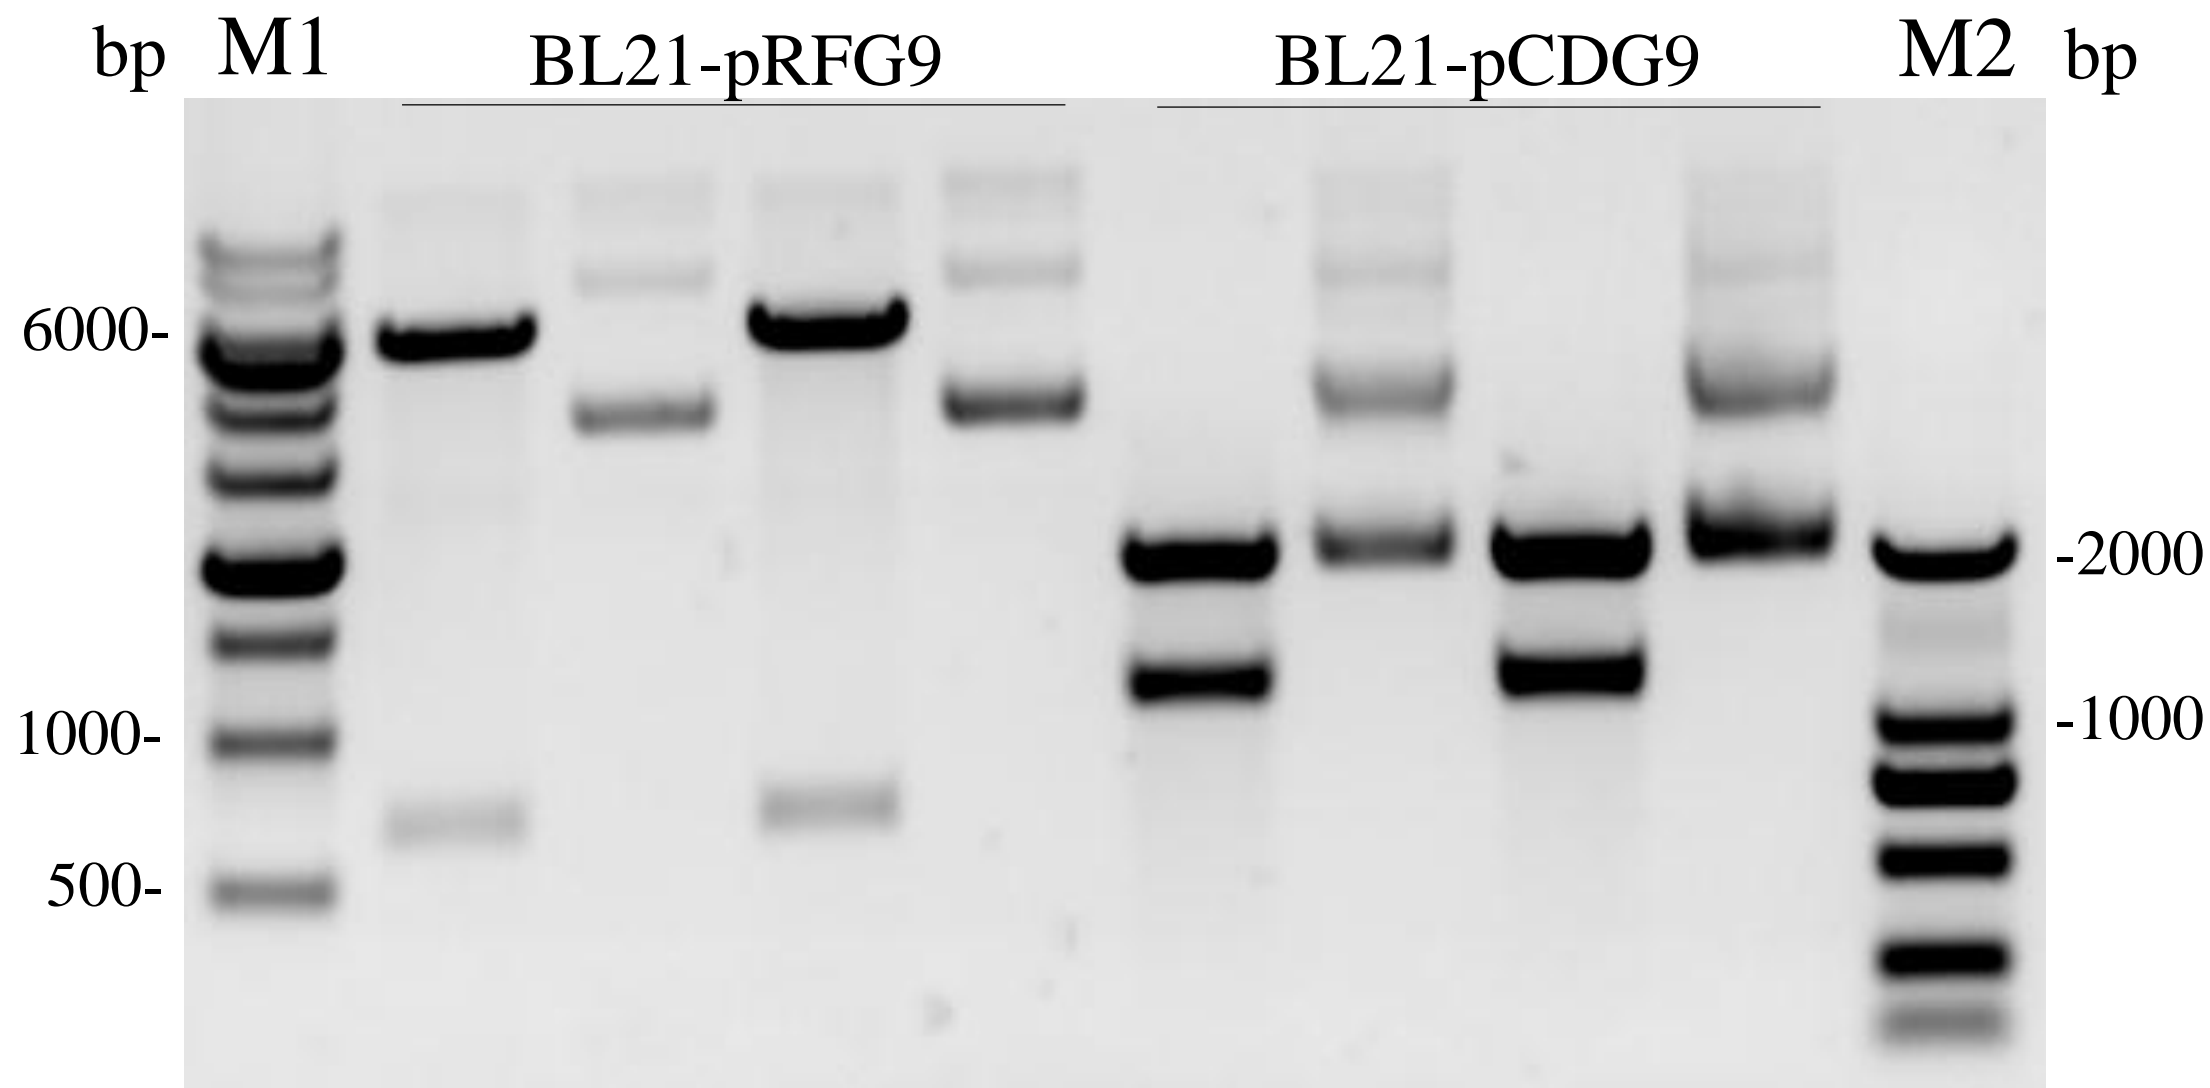

Supplement: Supplementary file 3 [file 21105795]

a

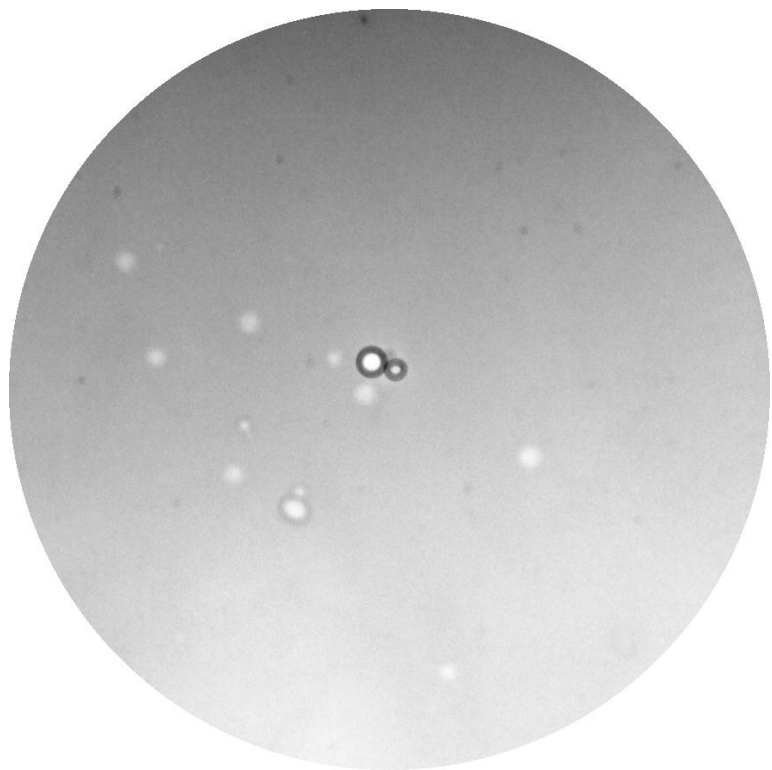

b

bp

M

10 plagues

1000-

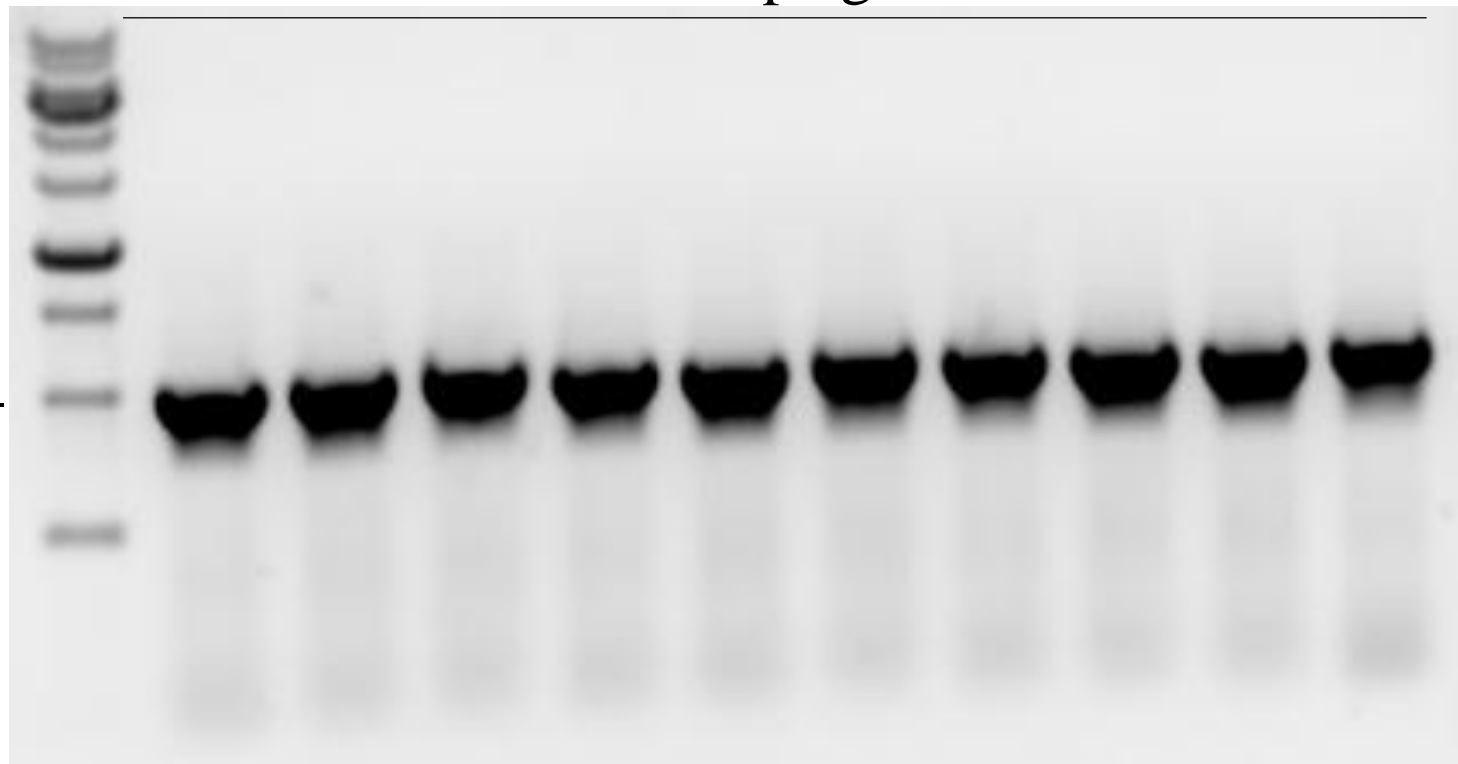

Supplement: Supplementary file 4 [file 21105795]

a

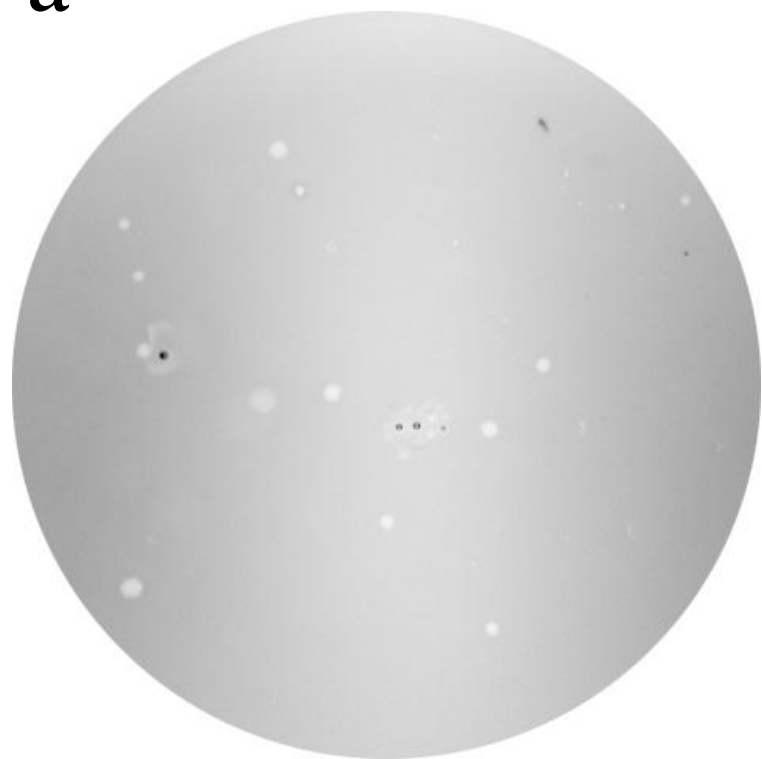

b

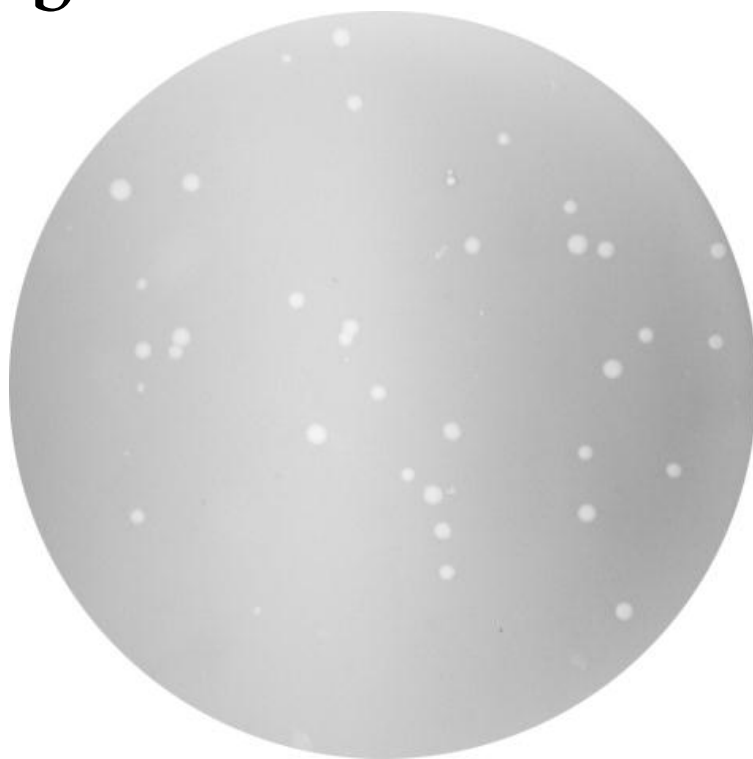

c

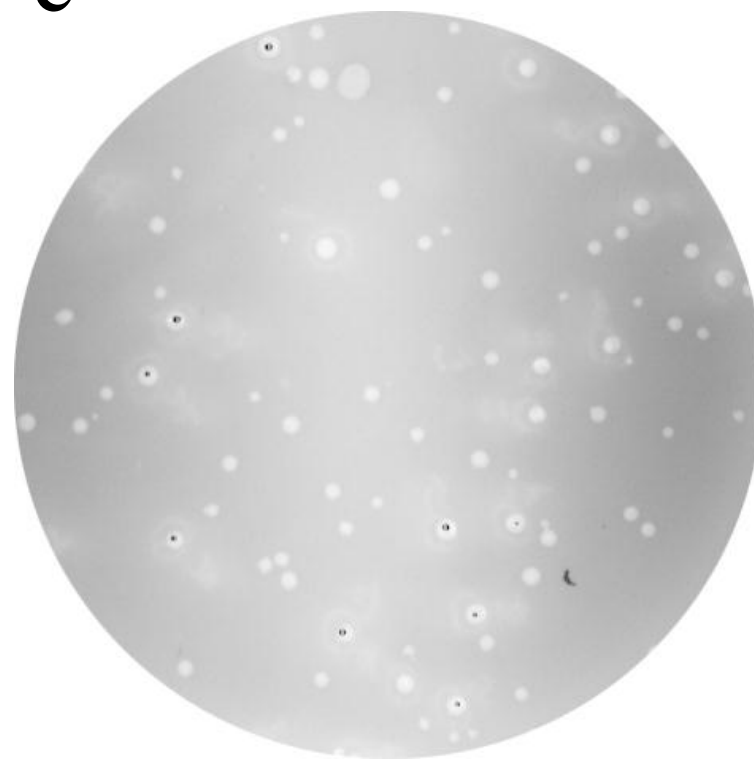

Supplement: Supplementary file 5 [file 21105795]

12 colonies

M bp

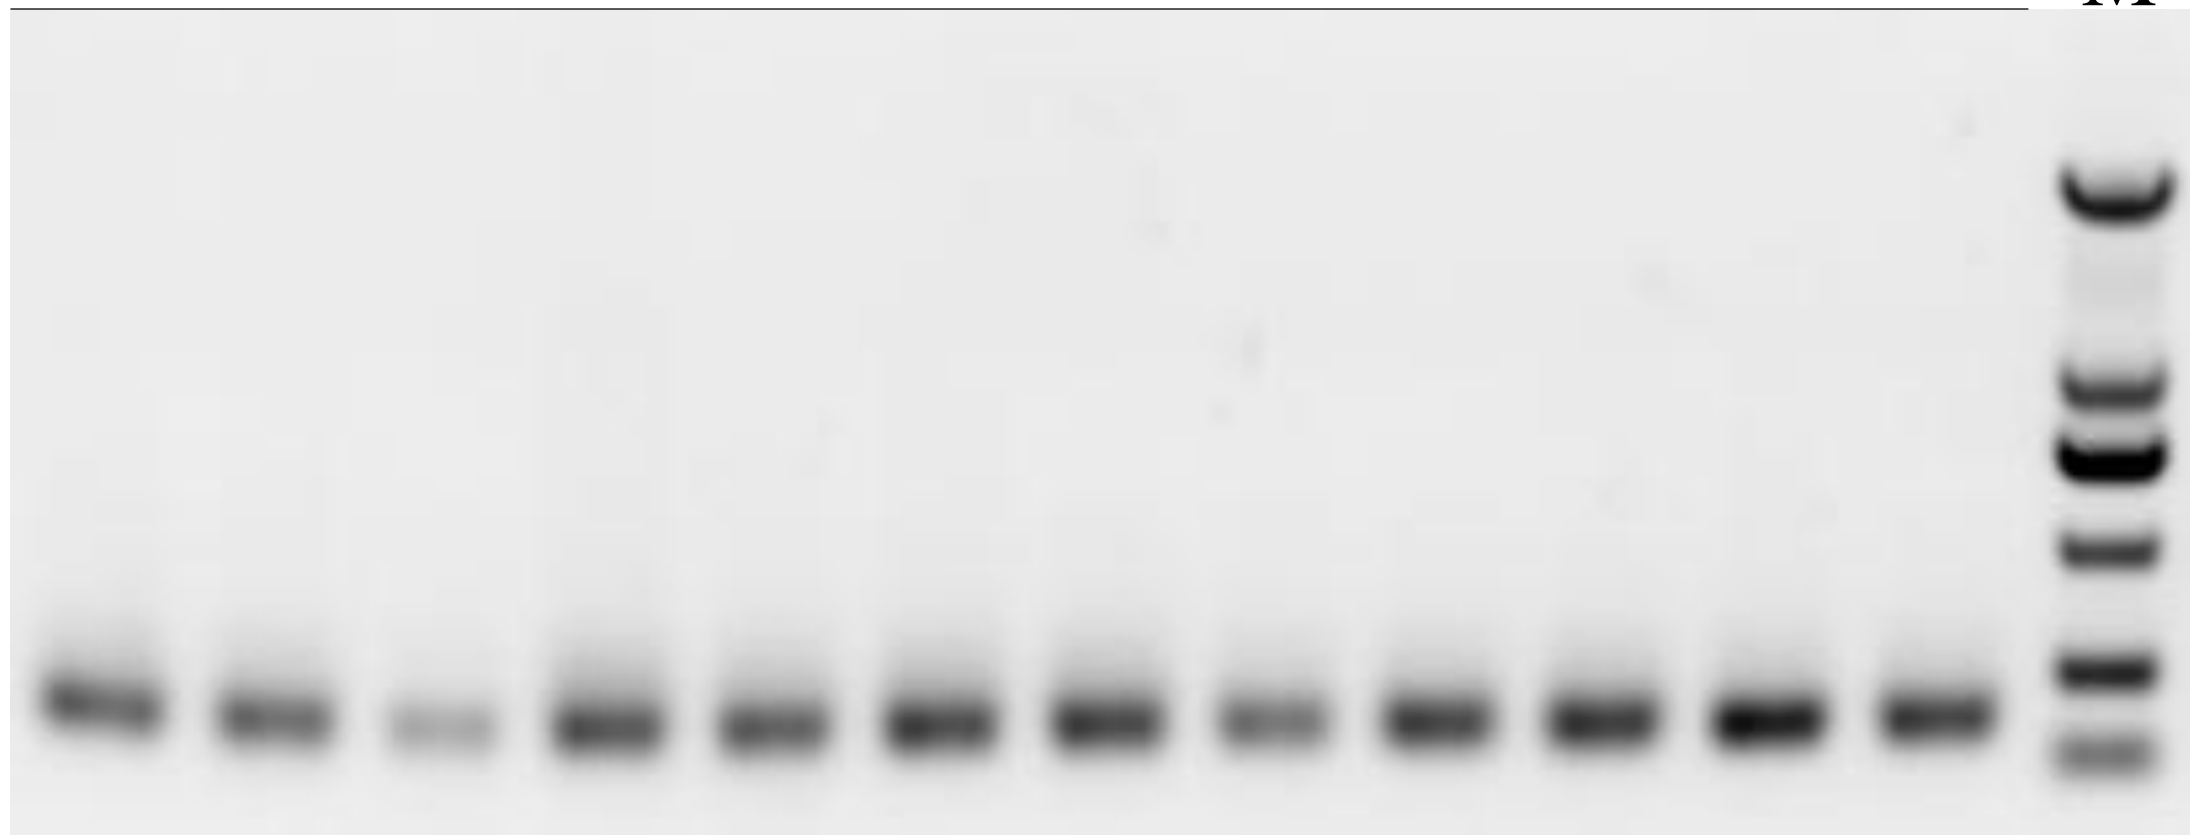

-250

-100

Supplement: Supplementary file 6 [file 21105795]

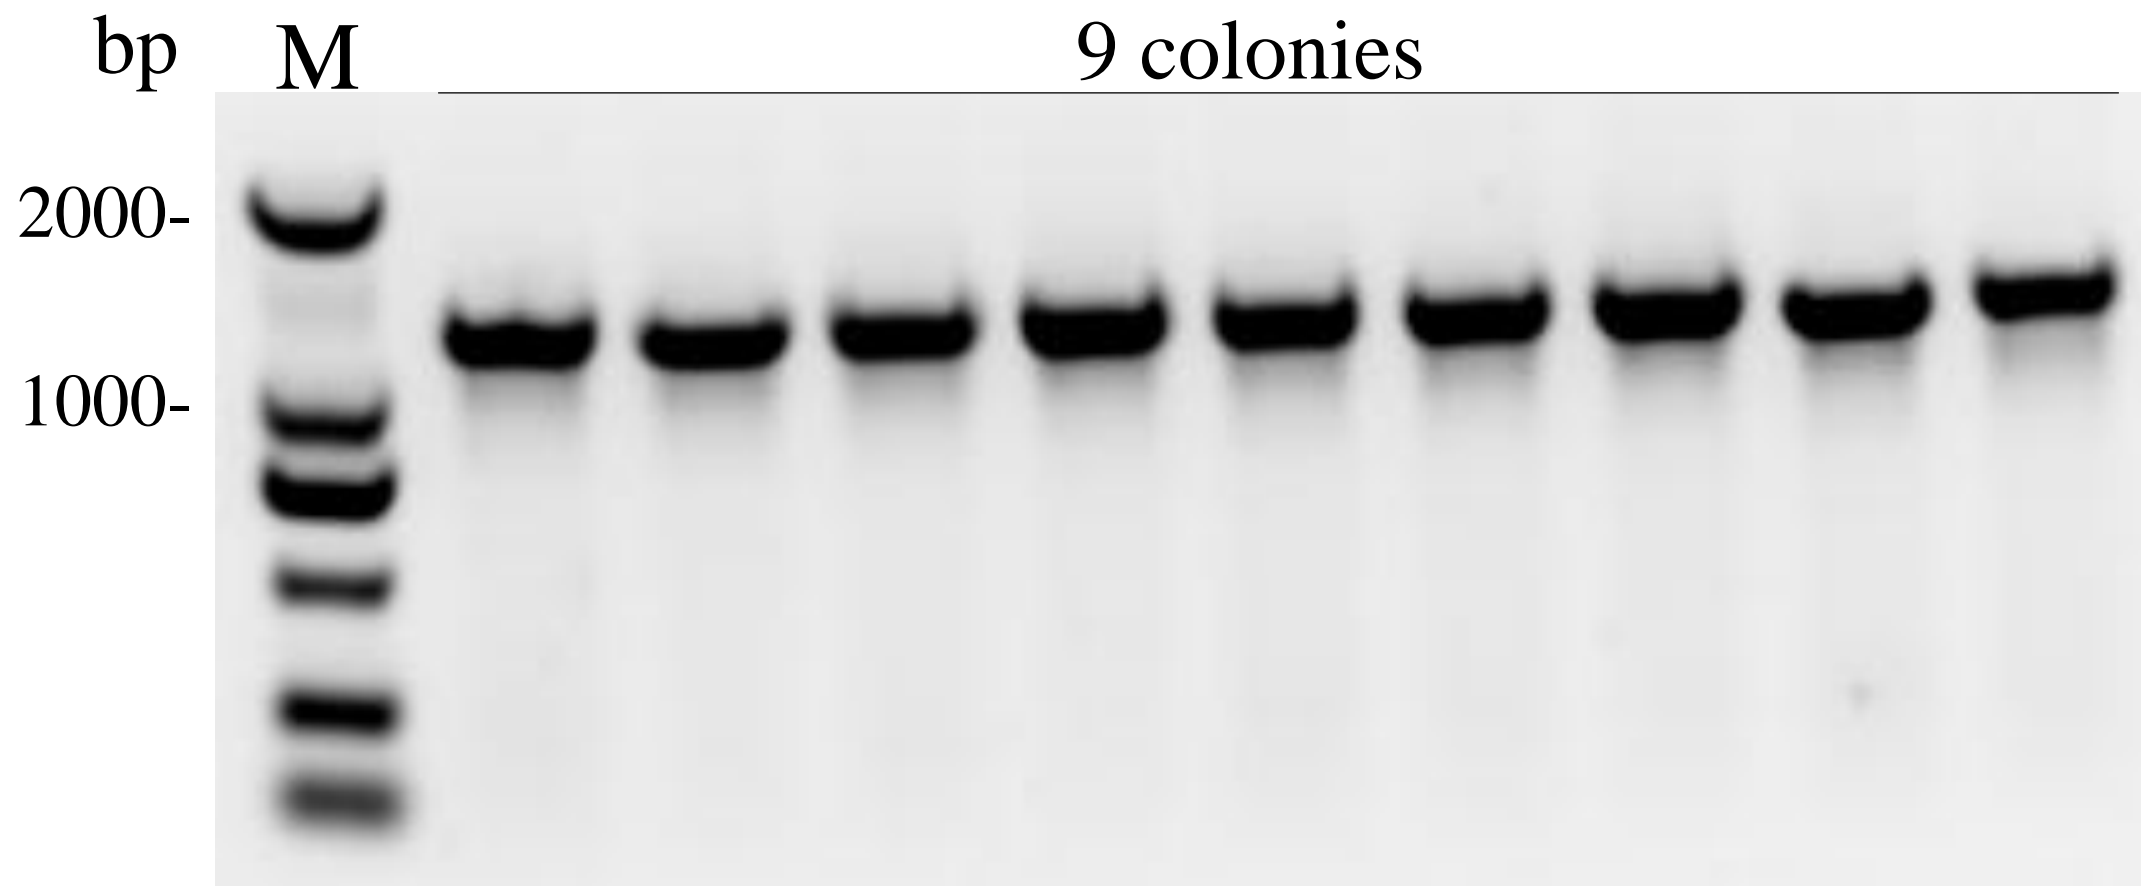

Supplement: Supplementary file 7 [file 21105795]

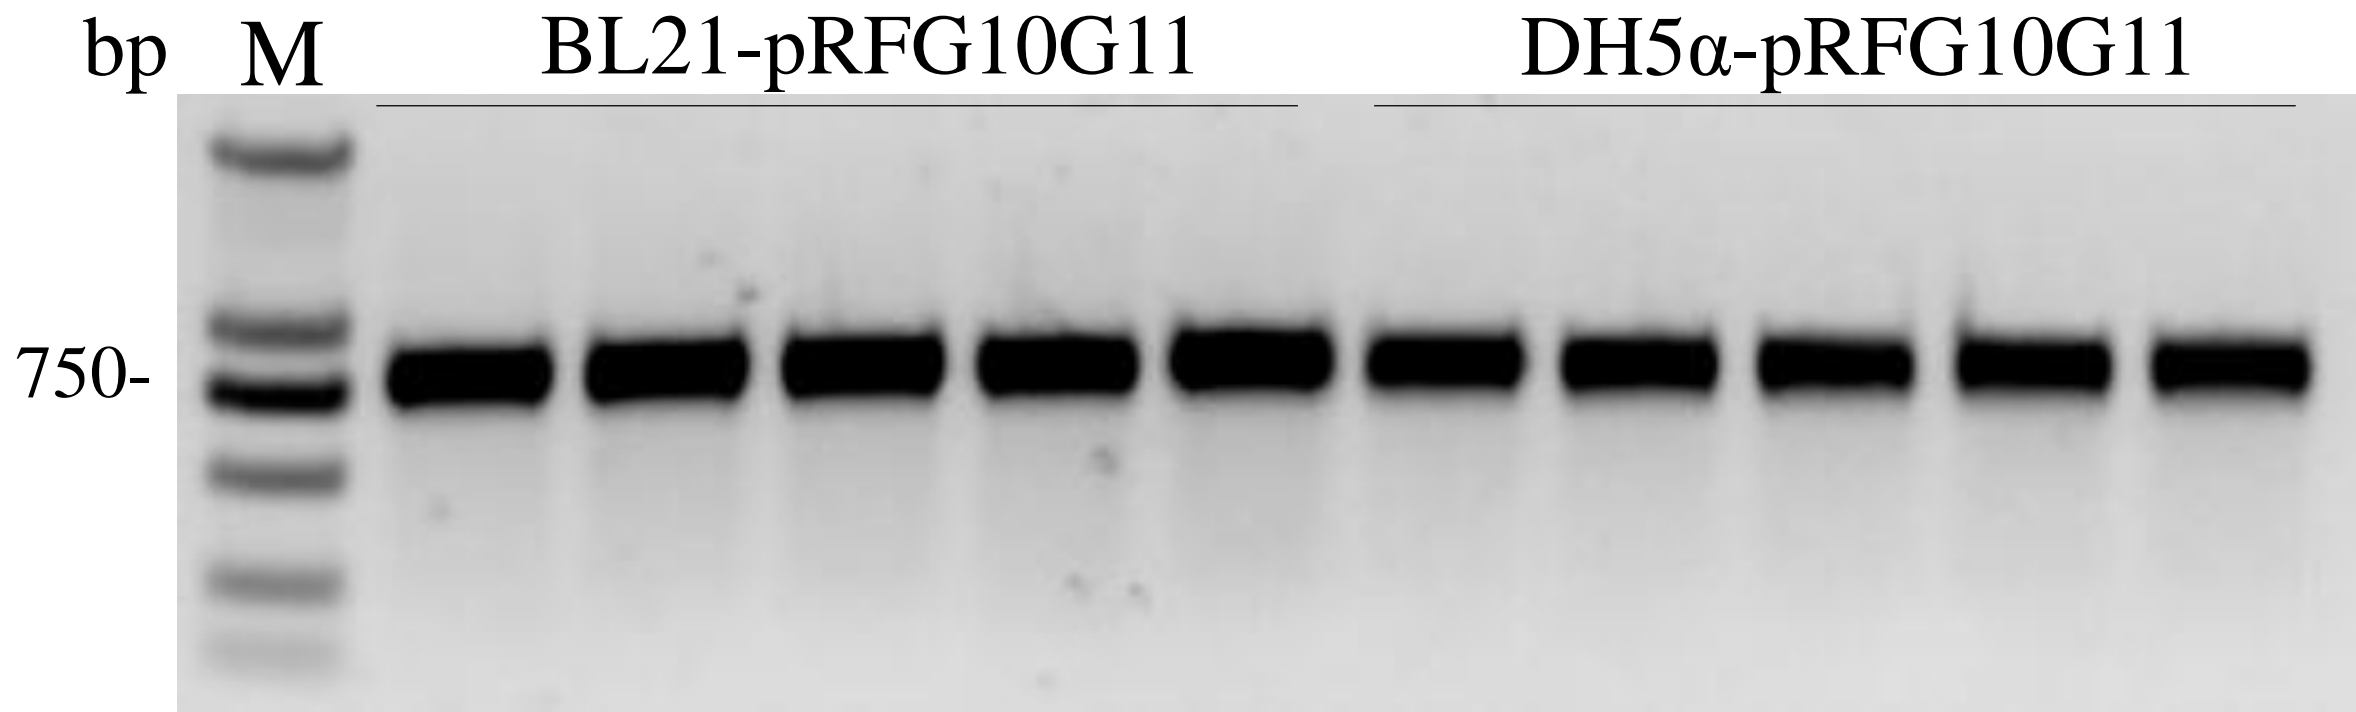

Supplement: Supplementary file 8 [file 21105795]

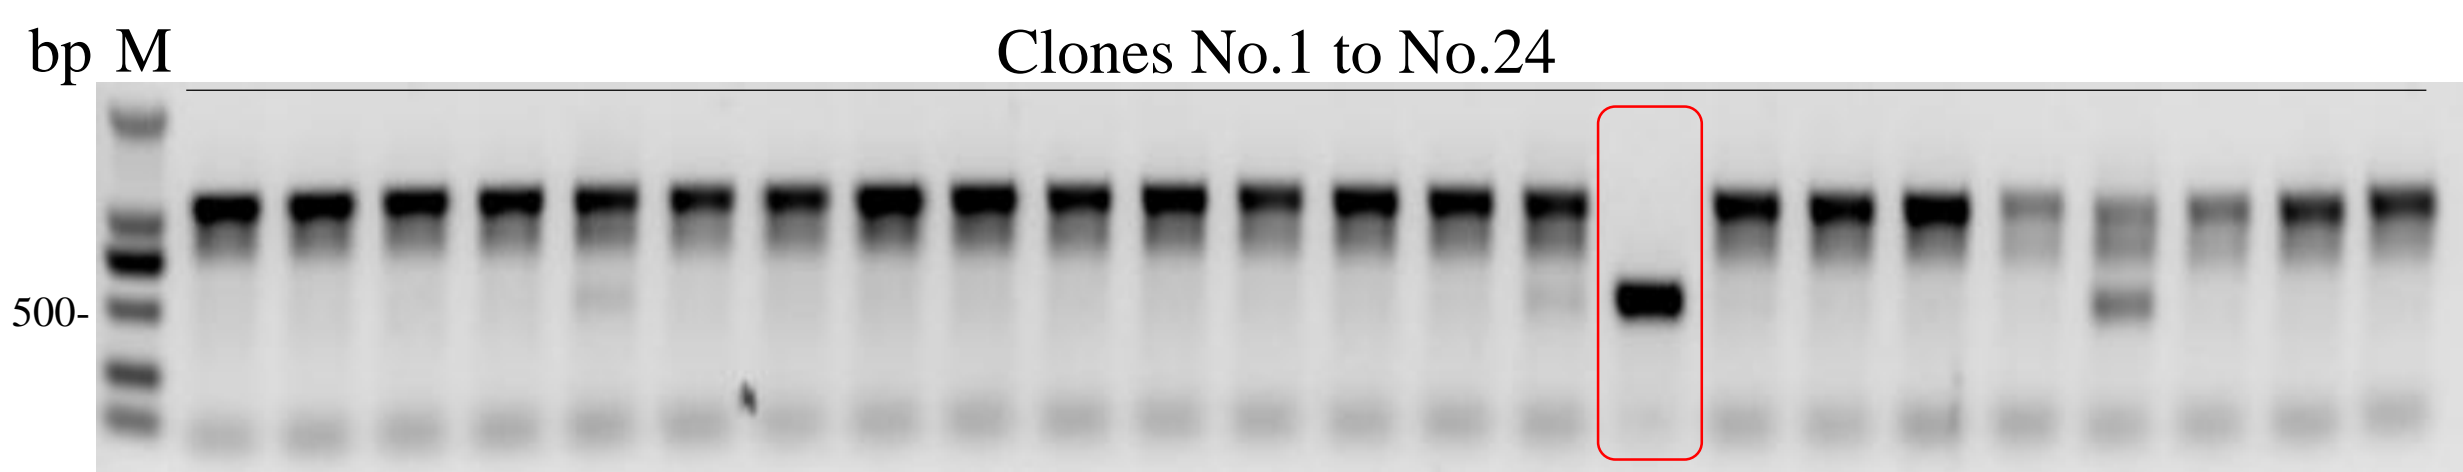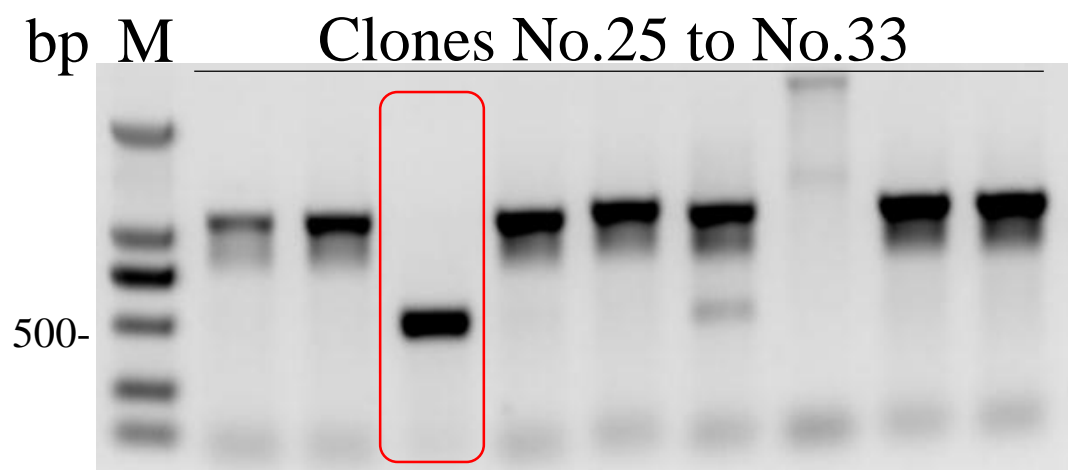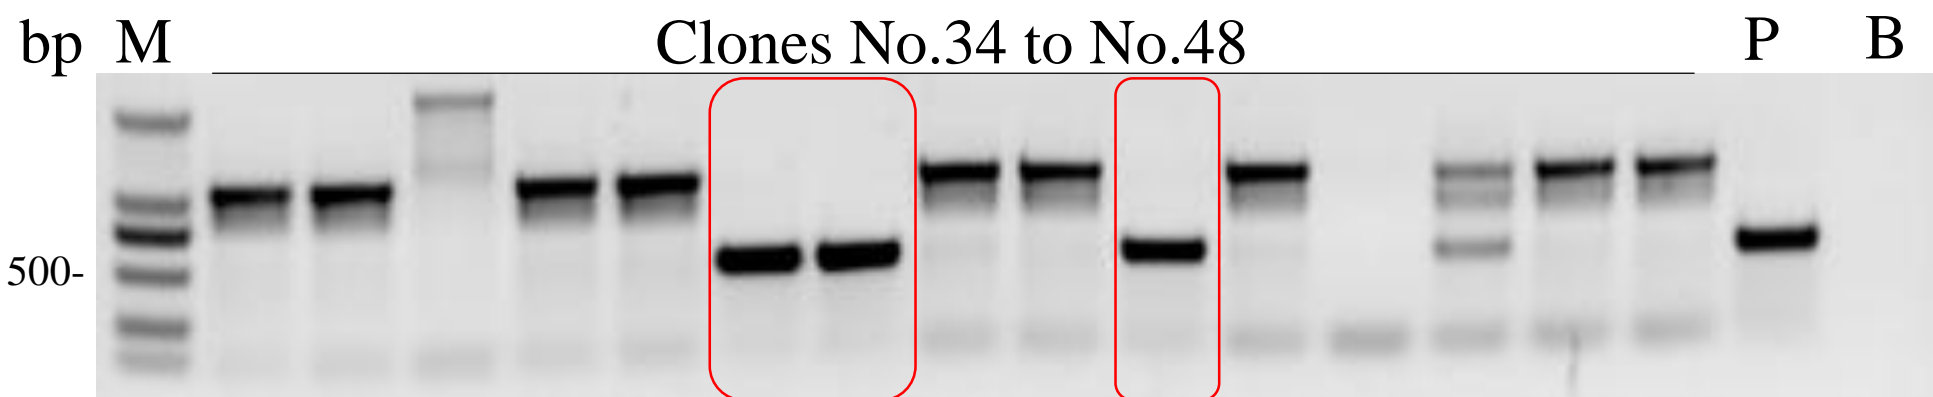

Supplement: Supplementary file 9 [file 21105795]

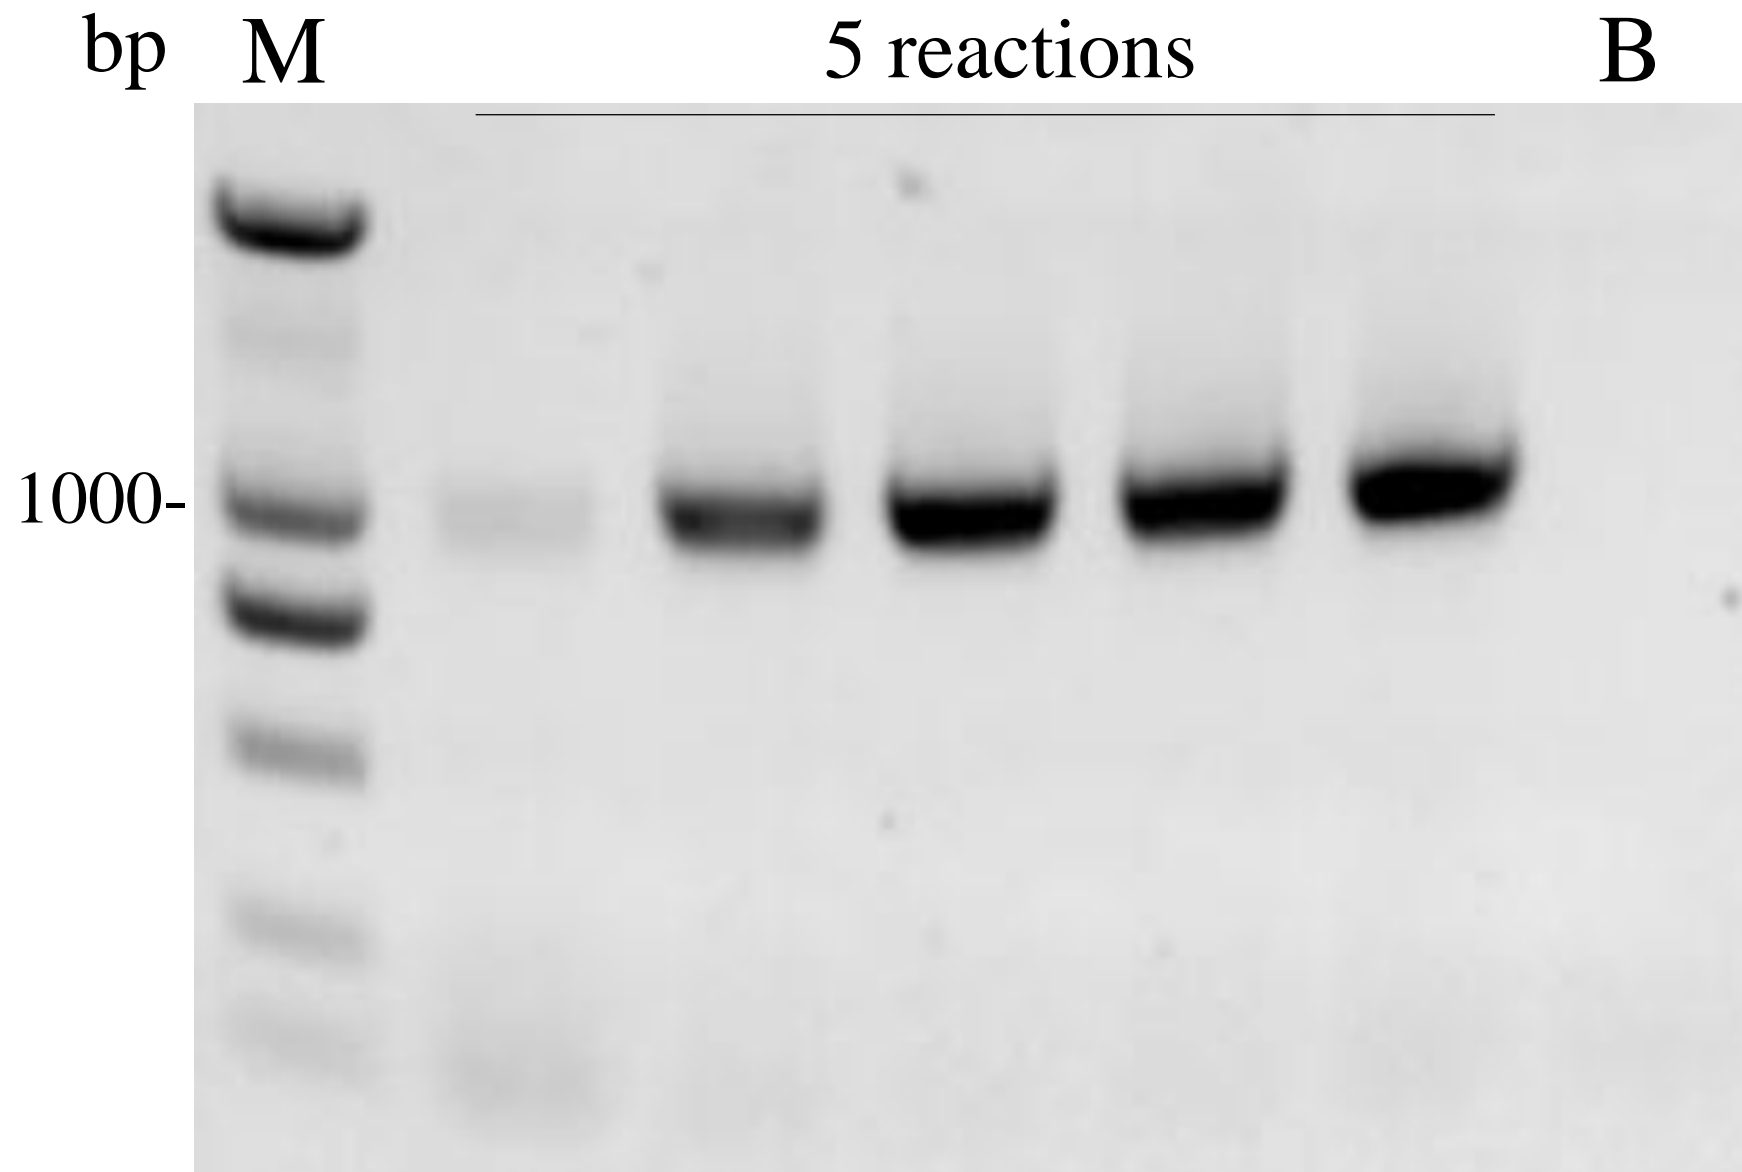

Supplement: Supplementary file 10 [file 21105795]
